# Supplementary material for: Gemini surfactant assisted synthesis of mesoporous Mn/Mg bimetal doped TiO2 nanomaterial:&nbsp;Characterization and photocatalytic activity studies under visible light irradiation
Source: Research Square preprint supplement (doi:10.21203/rs.3.rs-45648/v3), 2020-10-15
Supplement: Supplementary file 1 [file c3f674fd8ba68a079ee7b07c.docx]

Gemini surfactant assisted synthesis of mesoporous Mn/Mg bimetal doped TiO2 nanomaterial: Characterization and photocatalytic activity studies under visible light irradiation

Sankara Rao Miditana, Siva Rao Tirukkovalluri*, Imandi Manga Raju, Shaik Abdul Alim, Genji Jaishree, M.L.V. Prasanna Chippada

Department of Inorganic & Analytical Chemistry, A.U. College of Science & Technology, Andhra University, Visakhapatnam, Andhra Pradesh, India-530003.

* Correspondence: +91 7702110459, [sivaraoau@gmail.com](mailto:sivaraoau@gmail.com)


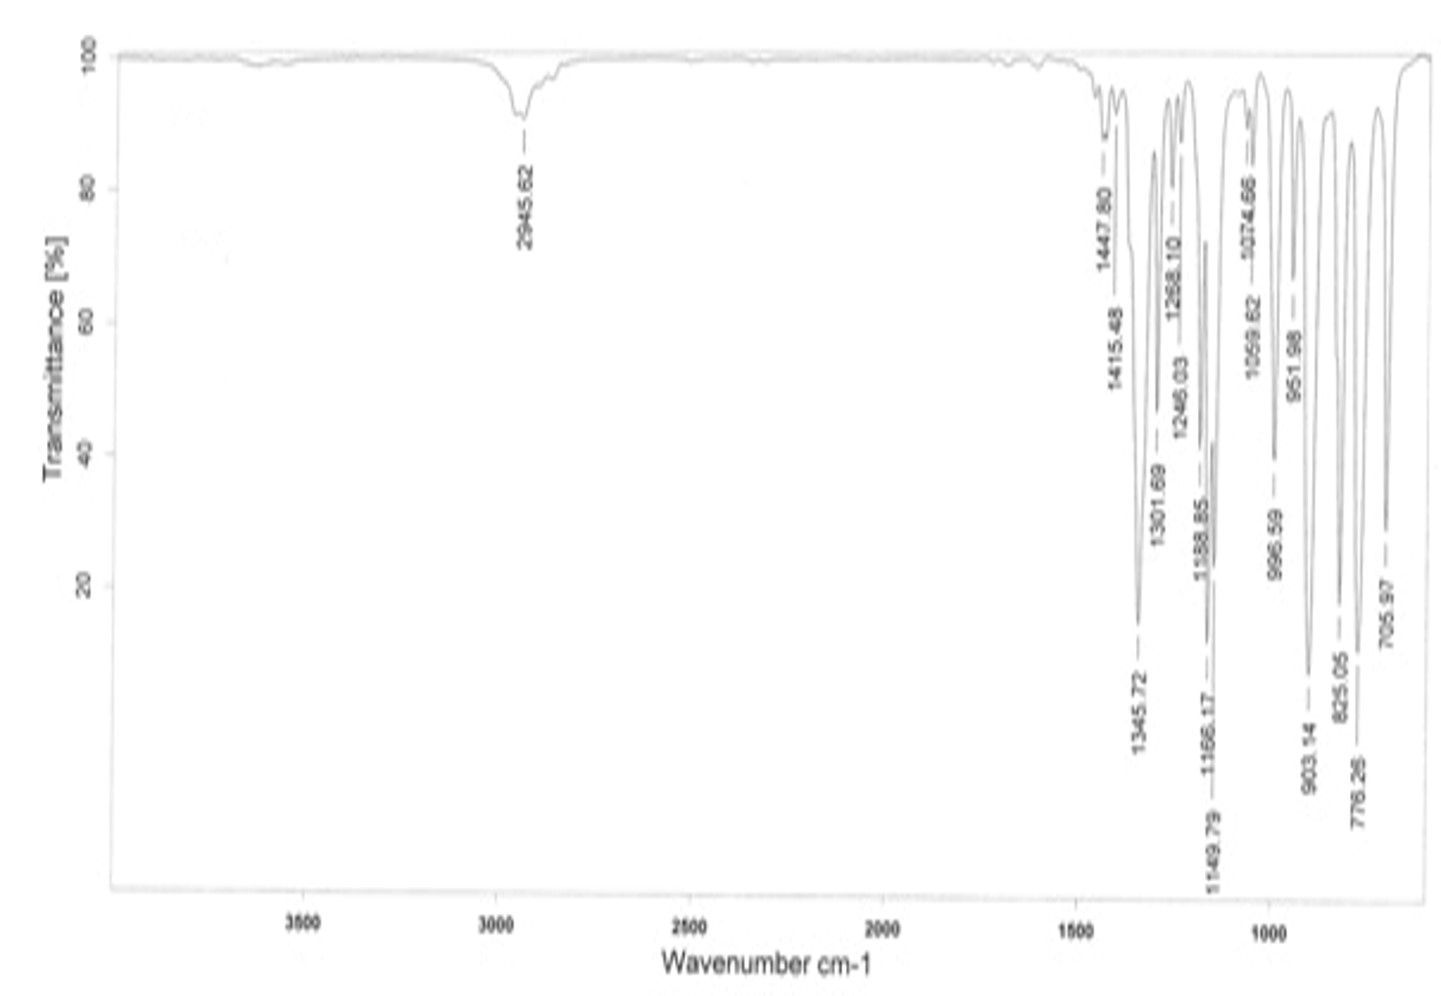


**Fig. S1** FT-IR spectra of Gemini Surfactant.
